# Supplementary material for: Novel dual LSD1/HDAC6 inhibitor for the treatment of cancer
Source: PubMed Central journal article supplement (PMC9810167; doi:10.1371/journal.pone.0279063), 2023-01-03
Supplement: pone.0279063.s001.pdf [file pone.0279063.s001.pdf]

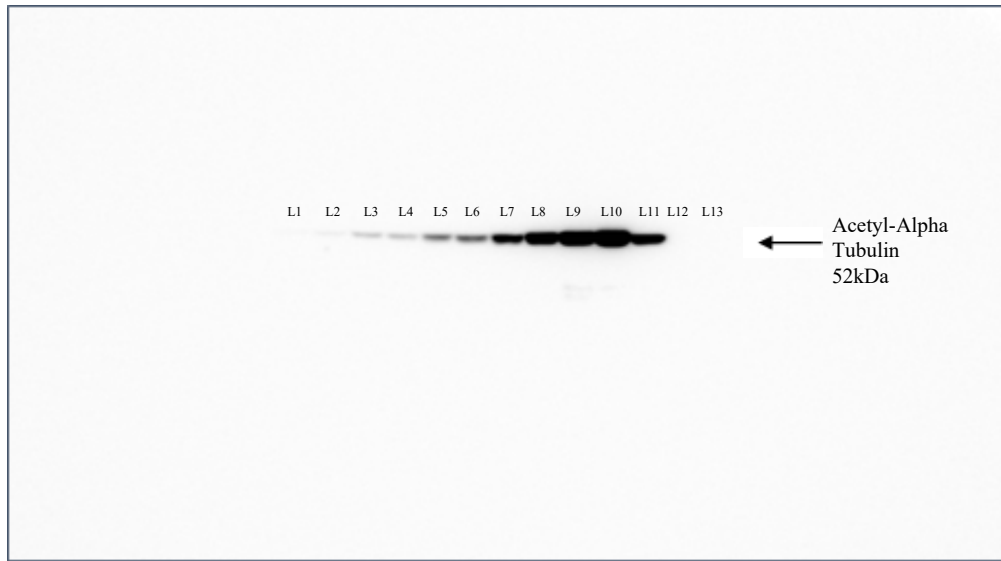

| Acetyl-Alpha Tubulin |         |                           |
|----------------------|---------|---------------------------|
| L1                   | Control |                           |
| L2                   | 0.0046  | JBI-097 ( $\mu\text{M}$ ) |
| L3                   | 0.0137  |                           |
| L4                   | 0.0412  |                           |
| L5                   | 0.1235  |                           |
| L6                   | 0.3704  |                           |
| L7                   | 1.1111  |                           |
| L8                   | 3.3333  |                           |
| L9                   | 10      | JBI-135 ( $\mu\text{M}$ ) |
| L10                  | 1       |                           |
| L11                  | 10      | JBI-236 ( $\mu\text{M}$ ) |
| L12                  | 1       |                           |
| L13                  | 10      |                           |

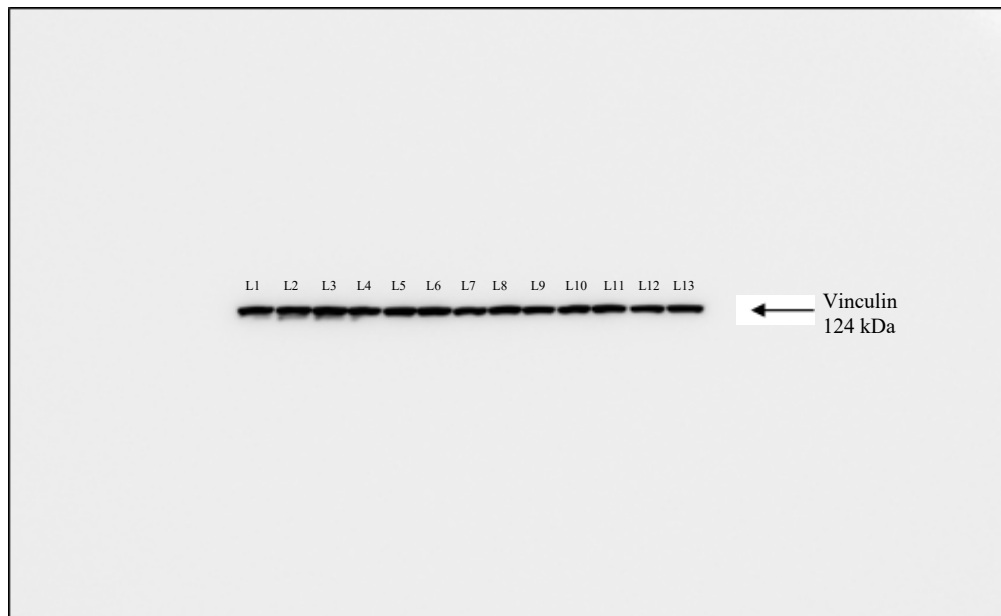

| Vinculin |         |                           |
|----------|---------|---------------------------|
| L1       | Control |                           |
| L2       | 0.0046  | JBI-097 ( $\mu\text{M}$ ) |
| L3       | 0.0137  |                           |
| L4       | 0.0412  |                           |
| L5       | 0.1235  |                           |
| L6       | 0.3704  |                           |
| L7       | 1.1111  |                           |
| L8       | 3.3333  |                           |
| L9       | 10      | JBI-135 ( $\mu\text{M}$ ) |
| L10      | 1       |                           |
| L11      | 10      | JBI-236 ( $\mu\text{M}$ ) |
| L12      | 1       |                           |
| L13      | 10      |                           |
